# Supplementary material for: The Polycomb group protein Ring1b is essential for pectoral fin development
Source: Oxford University Press journal article supplement (doi:10.1242/dev.077156), 2012-05-22
Supplement: dev077156tables1.pdf [file dev077156tables1.pdf]

**Table S1. Primer sequences**

| Gene            | Forward primer           | Reverse primer            |
|-----------------|--------------------------|---------------------------|
| <i>dhrs3</i>    | GGGCTGCGCGTTGCTTTTCC     | AAGCAGCTCCTGAGATTAAGTCCGT |
| <i>dup6</i>     | ACGGTAGAGTGGCTGAAGGAGCA  | GCCCTCCGAGACCCAGGACC      |
| <i>eng1a</i>    | CCAGAGACTGAAGGCAGAGTTT   | GTCACTTTGCGAGCTTTTCAAG    |
| <i>hoxa9b</i>   | CCCGTGGTCCAGCAGCAGTC     | GTGCACTCACCCTCCCAACC      |
| <i>hoxb5b</i>   | TCGTTCTCAGGGCGCTATCCG    | TCTGCGTACGACTGGTGGTGGT    |
| <i>hoxc6a</i>   | GAACCCGTCGCTCTCGTGCC     | CTGGGCAACGTGGCTCTGCG      |
| <i>hoxc8a</i>   | ACAGAGCGTTGCCCGAAGCC     | CGTGAGGCCGCATCCAAGGG      |
| <i>hoxd9a</i>   | CCTCGTGCAGCTTCGCTCCC     | GTCCGCGCTCTCGGACACAG      |
| <i>meis3</i>    | TACCACAGCCCACTACCCTCAGC  | TCAGCAGGATTTGGTGCAGTTGT   |
| <i>msxc</i>     | GCACGTCTTCAATTCACCGTCTGT | CCCCAATTAGGGCAGACCTATGGA  |
| <i>pea3</i>     | TCACCGAAGCTCAAGTTCCT     | GGCTCCTGTTTGACCATCAT      |
| <i>sprouty4</i> | CGCCAGGTATCCTCGTGGA      | CGATTGCAAACGTATACCCTAGCCT |
| <i>wnt7a</i>    | AGGAAAACGCGCCGCTGGAT     | TCAGCCGAGCATCCTCCCCA      |
