# Supplementary figures and images for: The Polycomb group protein Ring1b is essential for pectoral fin development
Source: Oxford University Press journal article supplement (doi:10.1242/dev.077156), 2012-05-22

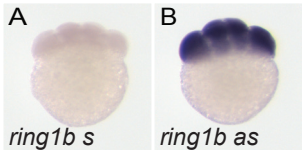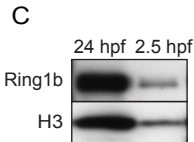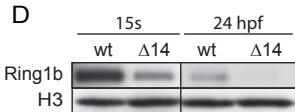

Supplement: dev077156figs01.pdf [file dev077156figs01.pdf]

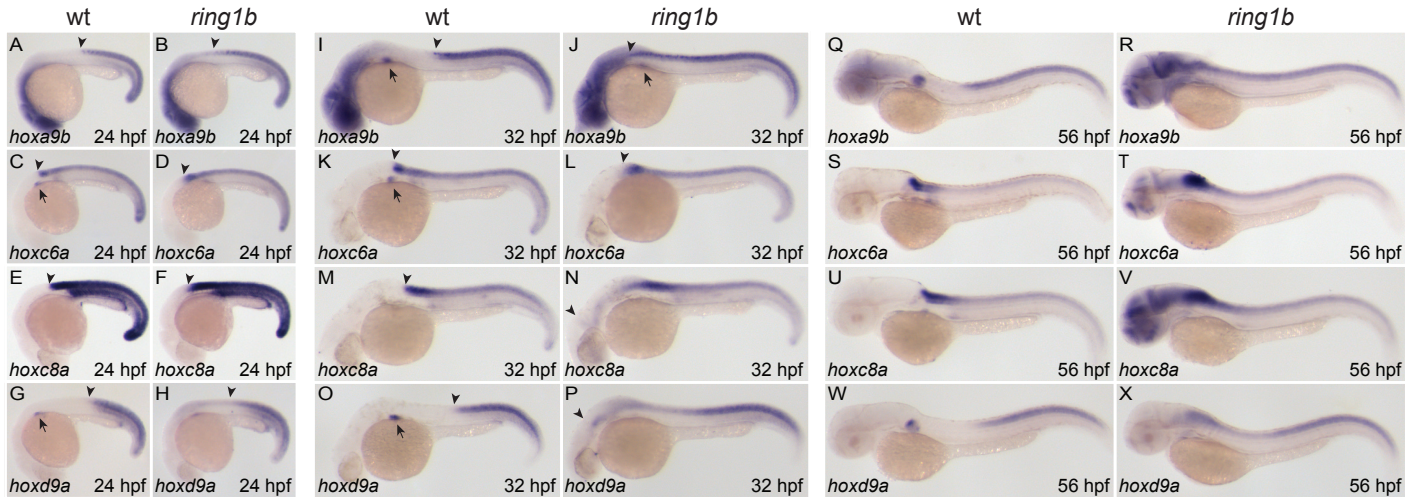

Supplement: dev077156figs02.pdf [file dev077156figs02.pdf]

wt

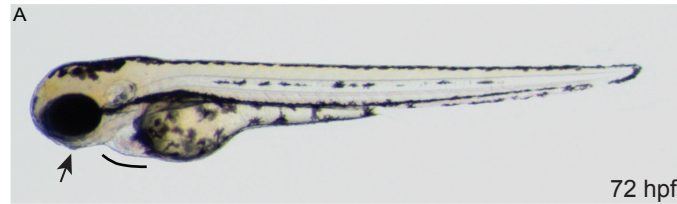

*ring1b*

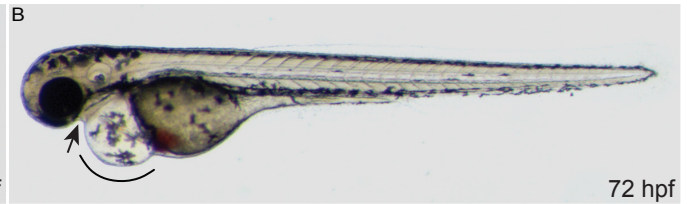

Supplement: dev077156figs03.pdf [file dev077156figs03.pdf]

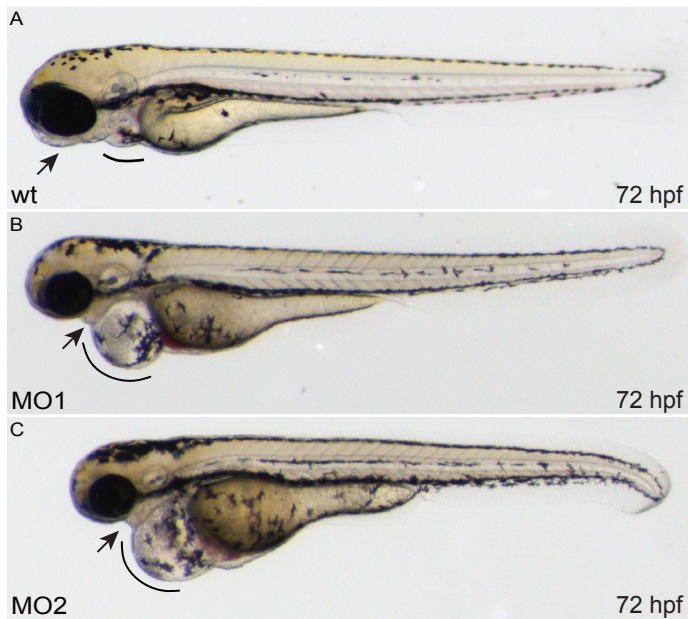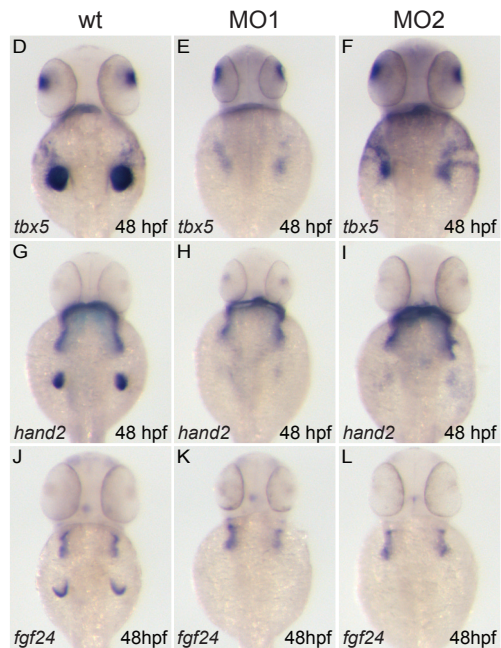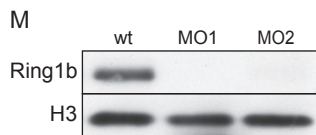

Supplement: dev077156figs04.pdf [file dev077156figs04.pdf]

wt

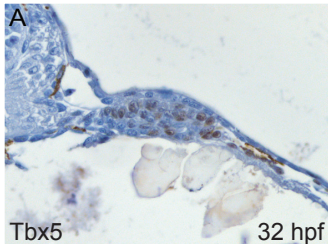

*ring1b*

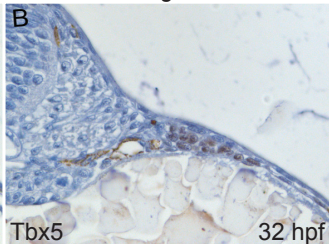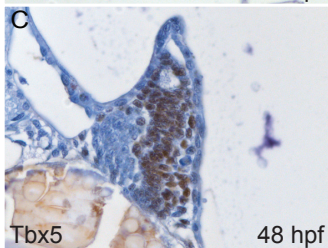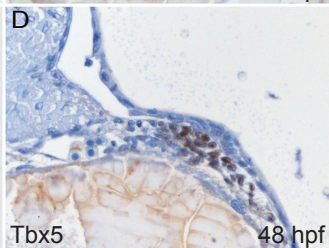

Supplement: dev077156figs05.pdf [file dev077156figs05.pdf]

**A**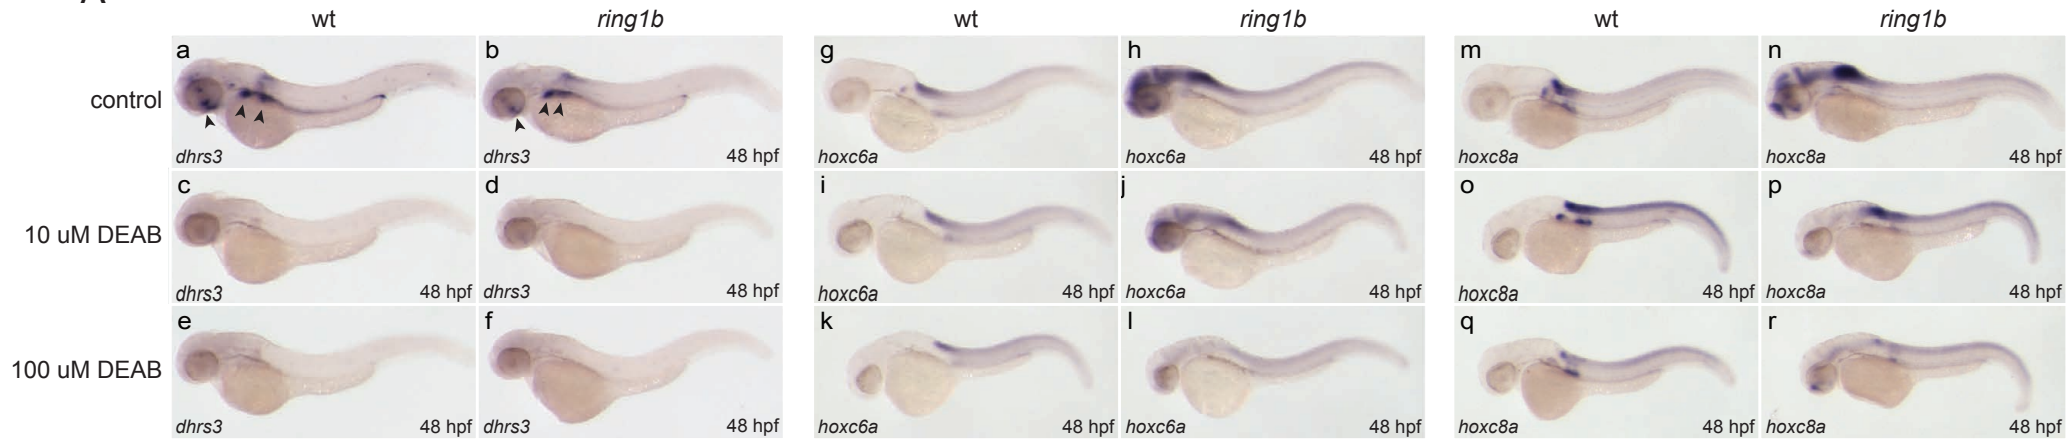**B**

DEAB incubation from 15s onwards

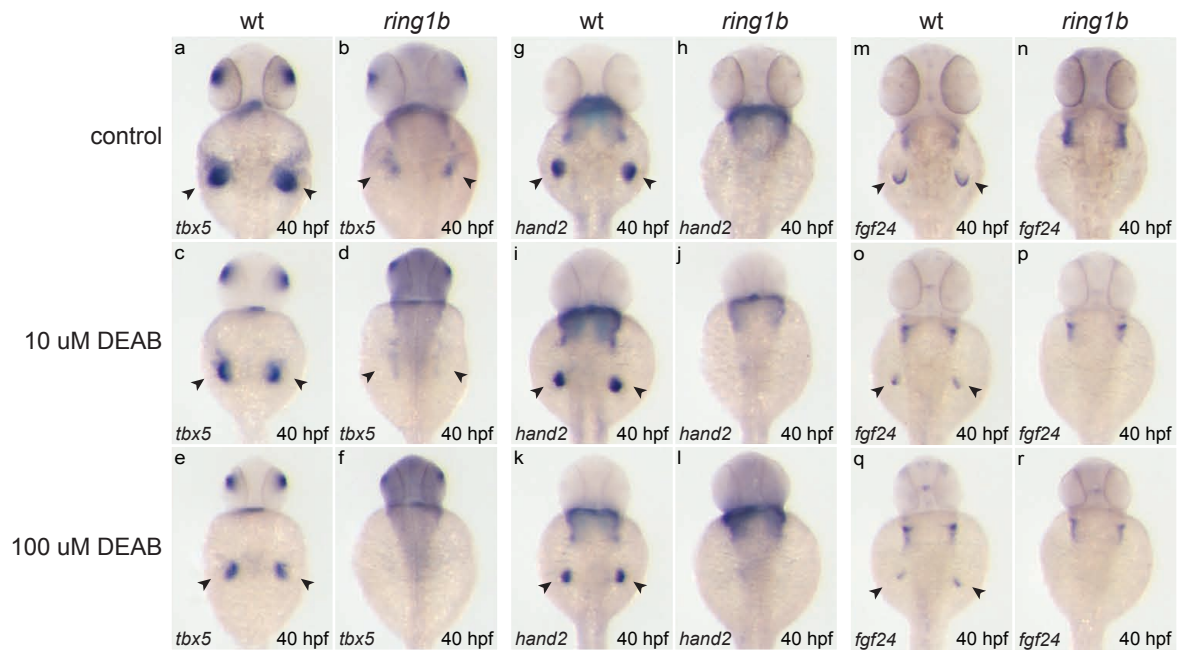**C**

DEAB incubation from 24 hpf onwards

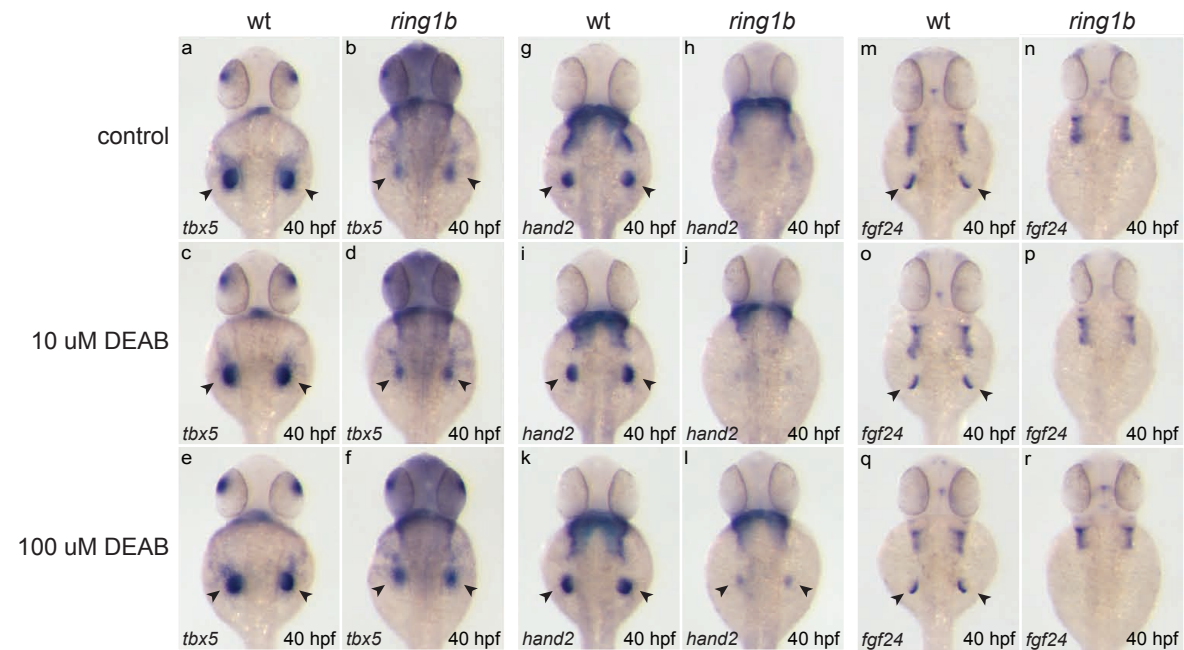

Supplement: dev077156figs06.pdf [file dev077156figs06.pdf]

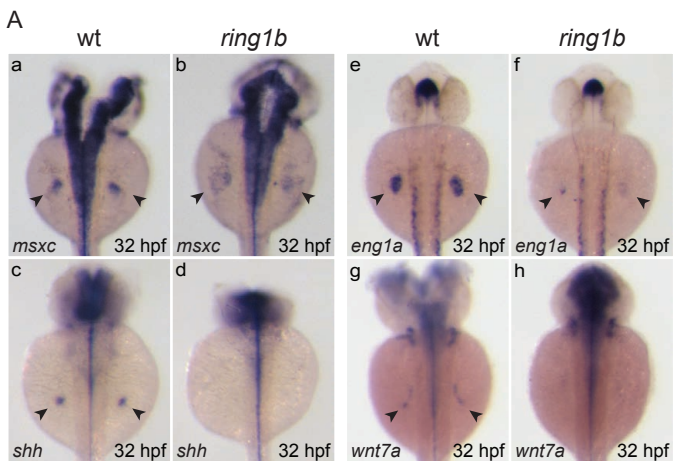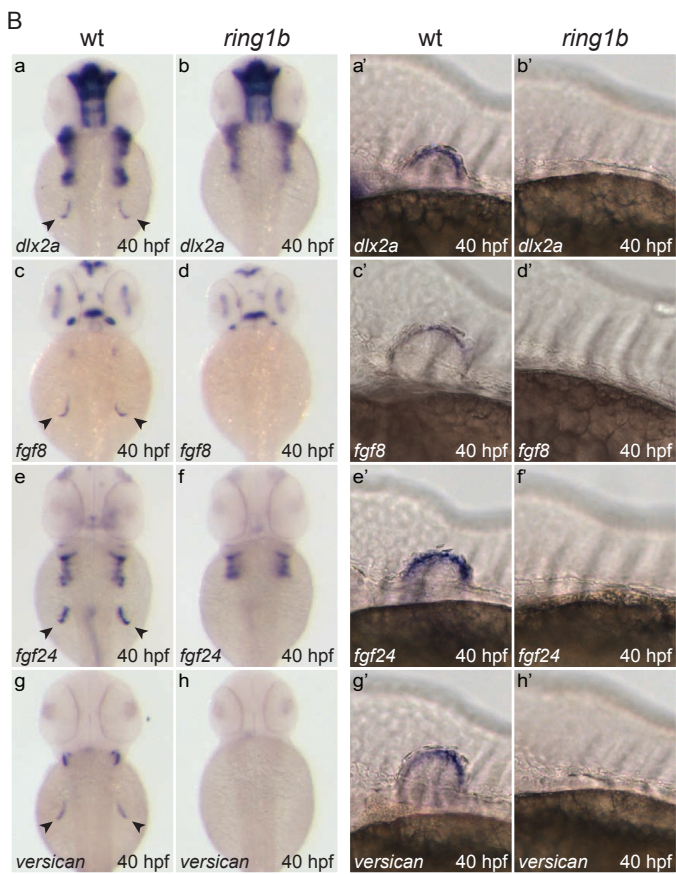

Supplement: dev077156figs08.pdf [file dev077156figs08.pdf]

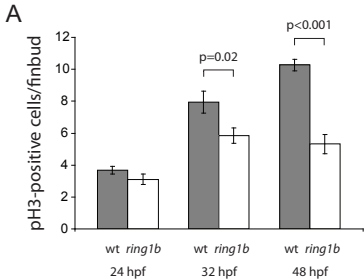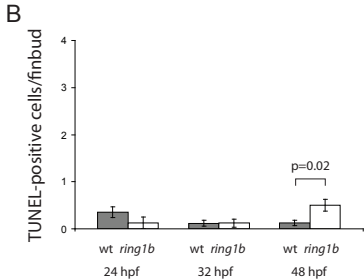

Supplement: dev077156figs09.pdf [file dev077156figs09.pdf]

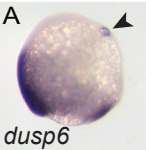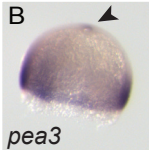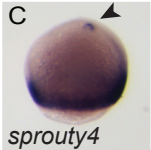

Supplement: dev077156figs10.pdf [file dev077156figs10.pdf]

wt

*apc*

*ring1b*

*apc/ring1b*

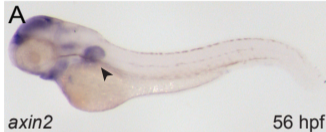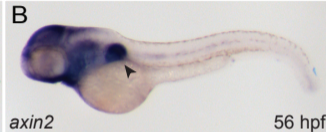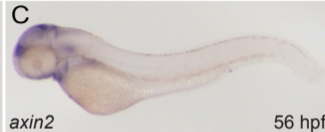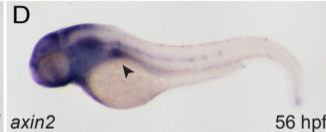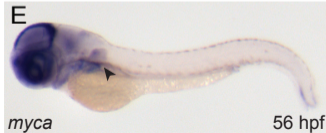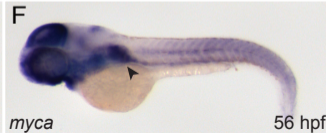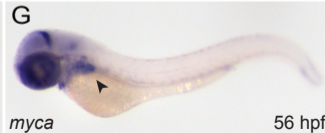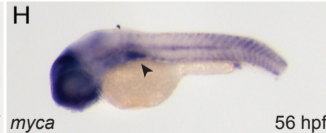

Supplement: dev077156figs11.pdf [file dev077156figs11.pdf]

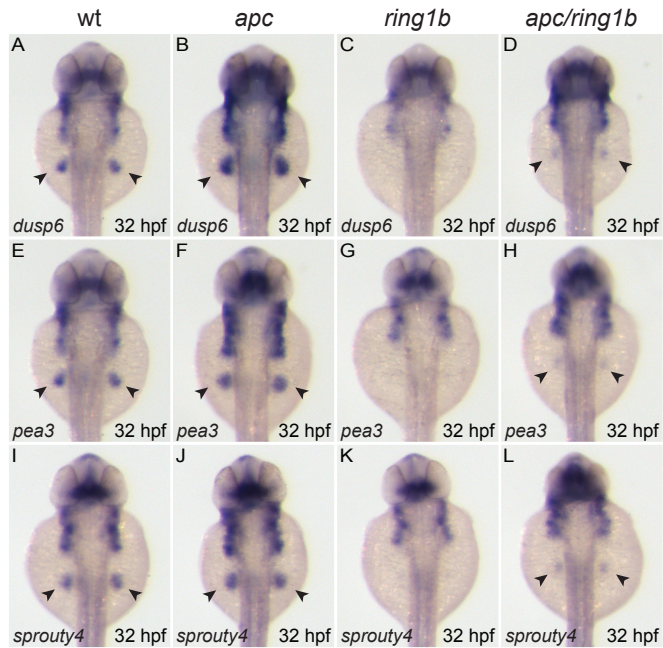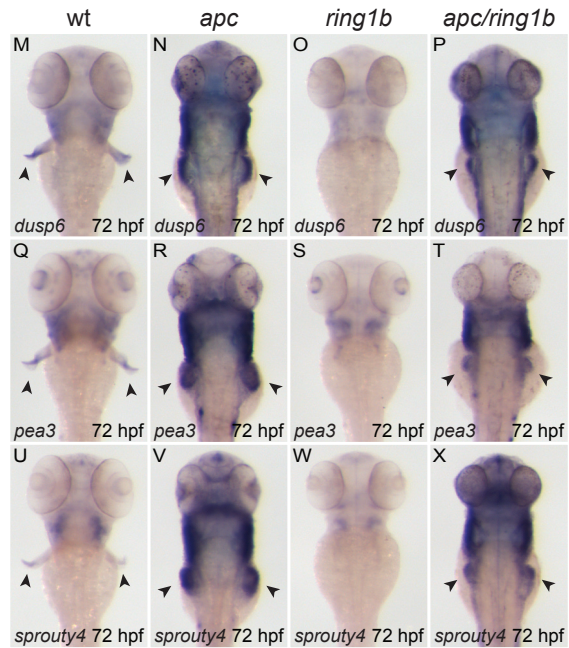

Supplement: dev077156figs12.pdf [file dev077156figs12.pdf]
